# Supplementary material for: Full-Length Computational Model of the SARS-CoV-2 Spike Protein and Its Implications for a Viral Membrane Fusion Mechanism
Source: MDPI journal article supplement (doi:10.3390/v13061126), 2021-06-11
Supplement: s1 [file s1]

Supplementary material for:

# Full-length computational model of the SARS-CoV-2 spike protein and its implications for a viral membrane fusion mechanism

Wataru Nishima <sup>1,2,\*</sup> and Marta Kulik <sup>3</sup>

<sup>1</sup> New Mexico Consortium, Los Alamos, NM 87545, USA

<sup>2</sup> University of New Mexico, Albuquerque, NM 87131, USA

<sup>3</sup> Biological and Chemical Research Centre, Department of Chemistry, University of Warsaw, Żwirki i Wigury 101, 02-839 Warsaw, Poland

\* Correspondence: wataru.nishima@gmail.com

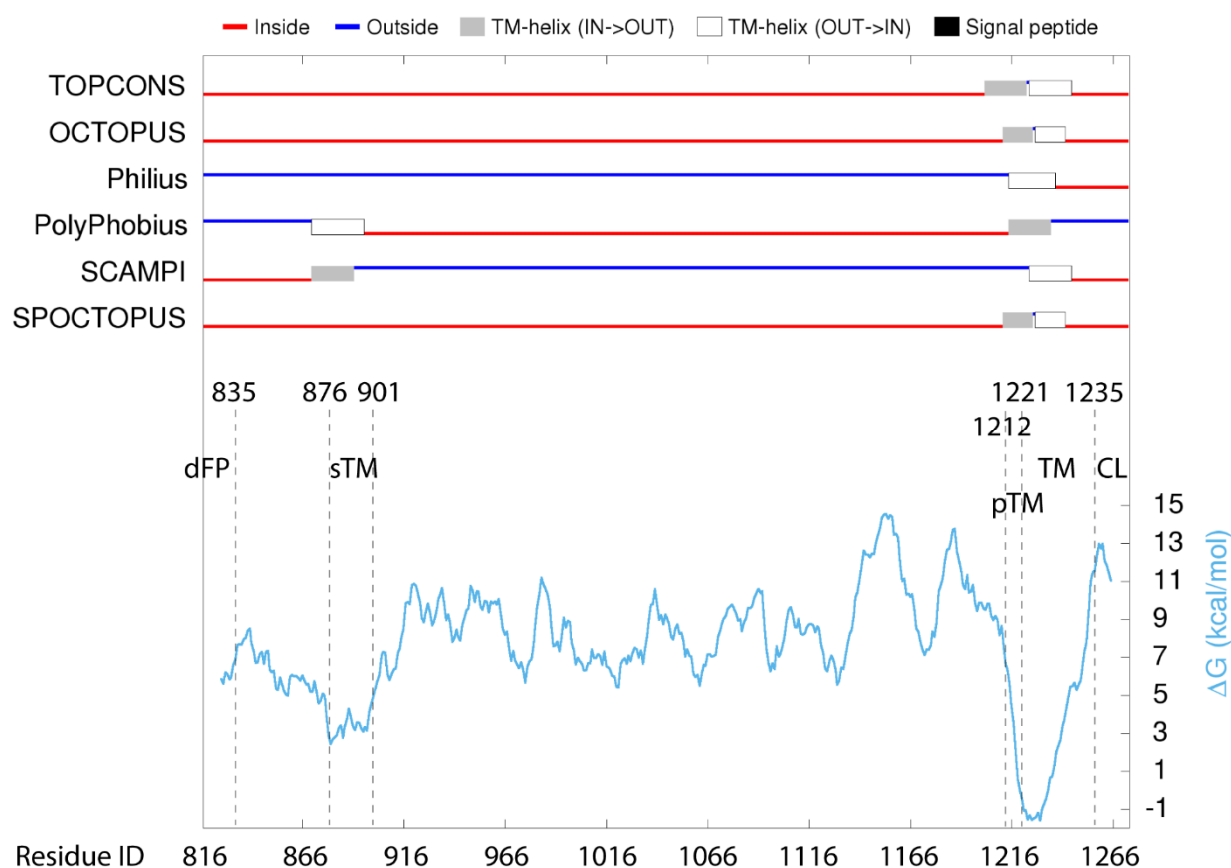

**Figure S1. Prediction of the transmembrane region.** The topology of membrane protein was predicted using TOPCONS [1], which performs multiple transmembrane prediction programs including OCTOPUS, Philius, PolyPhobius, SCAMPI, SPOCTOPUS. These programs utilize amino acid sequence based prediction algorithms. The free energy profile of the S2' subunit for the membrane insertion with a window of 21 amino acid segment centered around each position is shown. The sTM, pTM+TM region have lower free energy. The pTM+TM is predicted as a transmembrane by all of the prediction programs. sTM is also predicted as a transmembrane by the PolyPhobius and SCAMPI. It is noteworthy that we allocate the cytoplasm region (CL) between dFP and sTM, which are relatively hydrophilic.

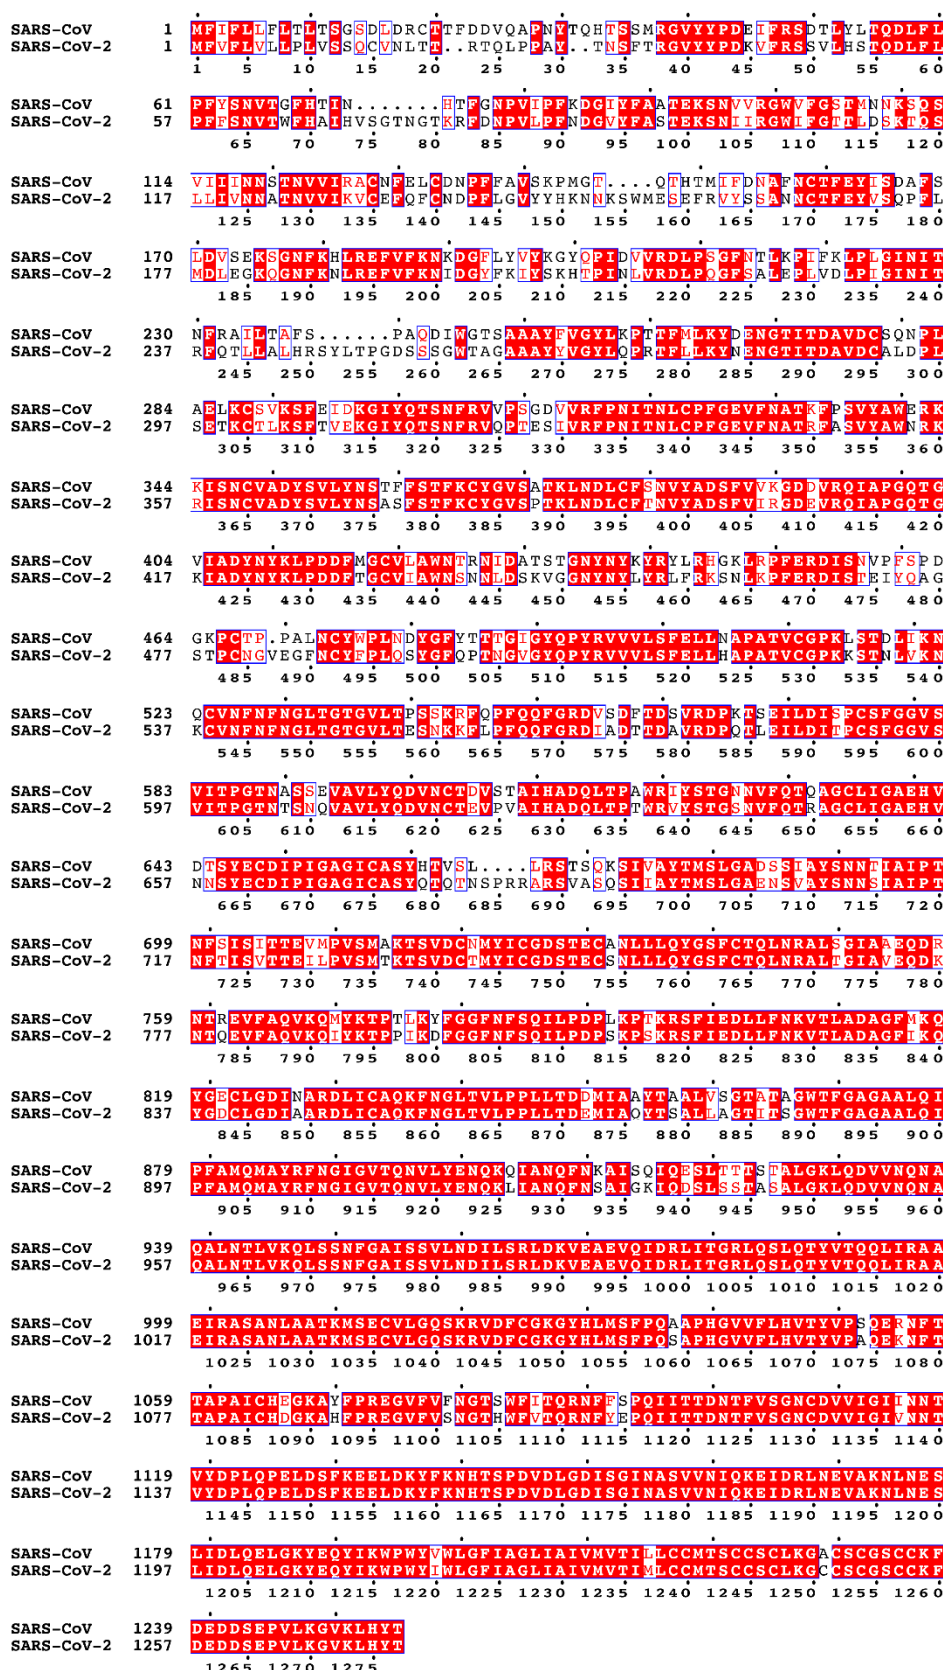

**Figure S2.** Sequence alignment between SARS-CoV-1 and SARS-CoV-2. The sequences of SARS-CoV-1/2 are obtained from Uniprot (P59594, P0DTC2). The sequence alignment was conducted using MAFFT [2]. The result was visualized using ESPrnt [3].

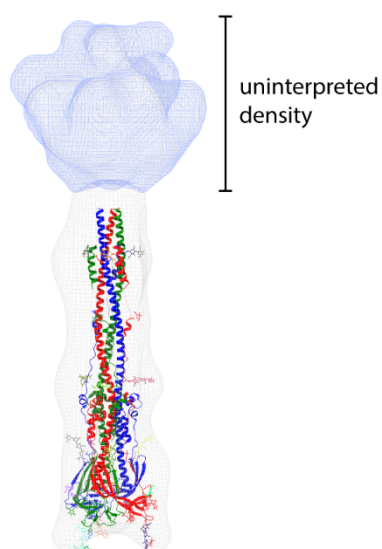

**Figure S3. Cryo-EM density used for the constraint for the POST structure modeling.** SARS-CoV-2 spike protein structure in POST state (PDB: 6XRA) was fitted into the Cryo-EM density map obtained for SARS-CoV-1 [4] (EMD-9597, resolution: 30.5 Å). There is large uninterpreted density region in the 'Head' region. The blue mesh volume is approximately 518,000 Å<sup>3</sup> (contour level: 0.033).

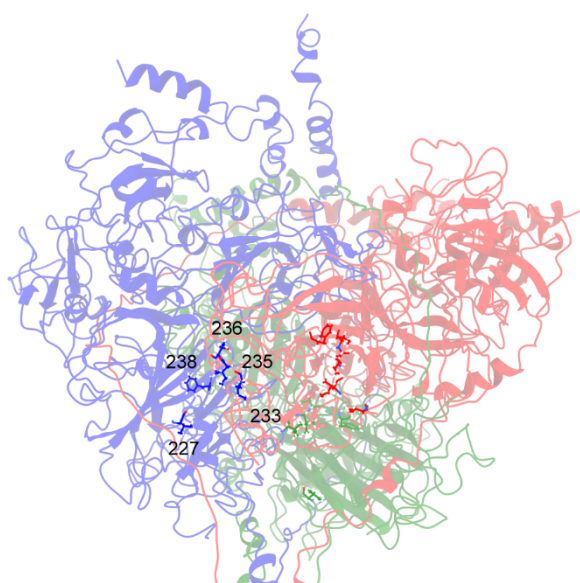

**Figure S4. Functionally important residues in S1.** Mutagenesis studies of the SARS-CoV-1 suggest L224A, L226A, I228A, T231A, and F233A reduces the viral entry. The corresponding residues for the SARS-CoV-2 are I227, I233, I235, T236, F238. I227 is interacting with the pTM strand. I233, I235, T236, F238 are localized near the inter-monomer interface. The mapping result implicates that the formation of an S1 trimer is important for viral entry.

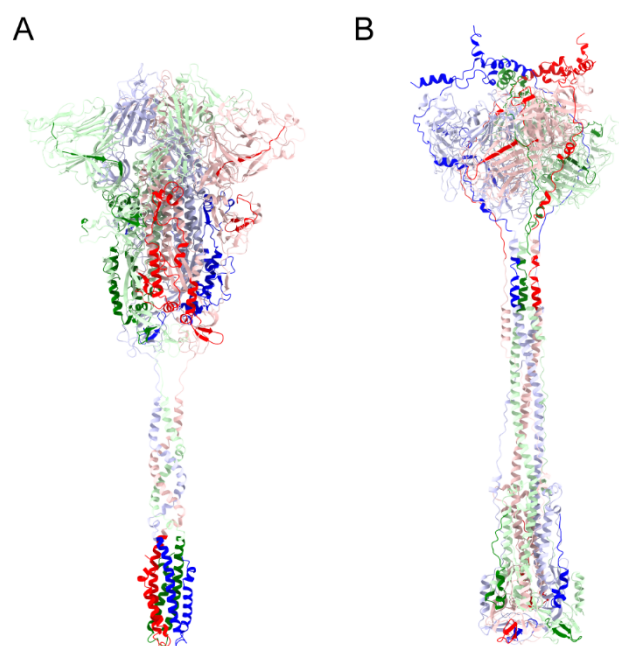

**Figure S5. Fusogenic segments mapped on the PRE and POST structures.** (A, B) PRE (A) and POST (B) structures colored by fusogenic segments (RGB) reported in the literature (Table S2). Both terminals of S2 (uFT, CT) involving the large structural transition from PRE to POST(INT) have fusogenic activities, and a large portion of stalk as well as fusion peptide related segments (N-term of S2) wraps the S1 trimer. uFP, as well as BR in POST structure, are located at the stem. In our proposed model, these fusogenic segments in the POST structure are extended along the surface of viral and host membranes.

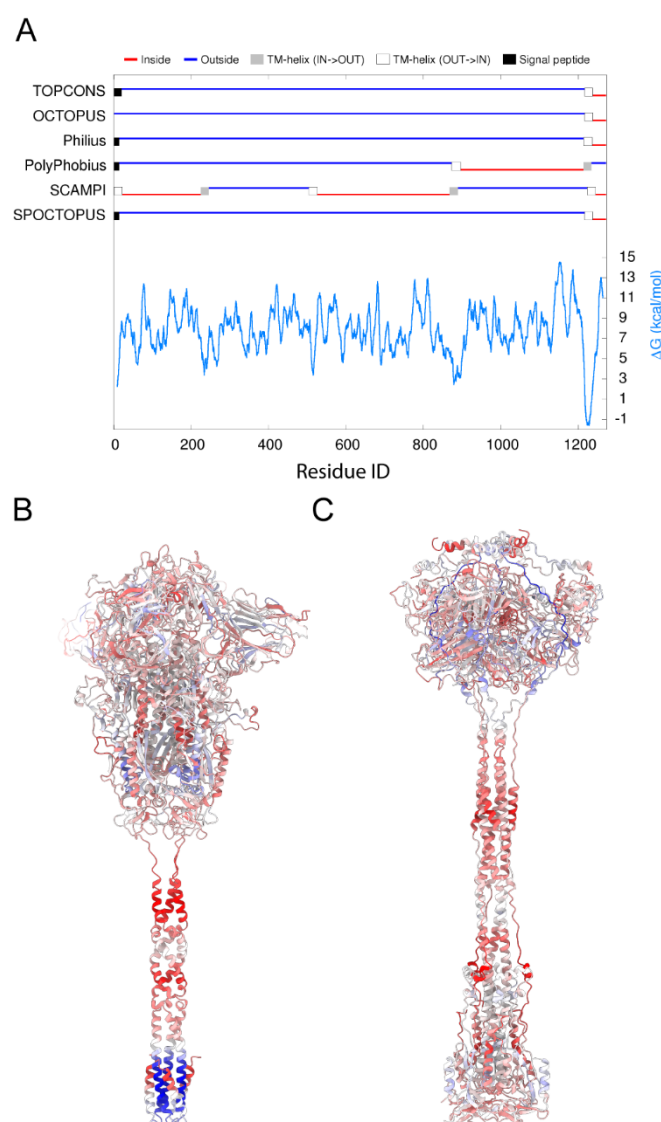

**Figure S6. Free energy for membrane insertion mapped onto the PRE and POST structures.** (A) Free energy profile for the membrane insertion obtained by TOPCONS [1]. The program predicts the free energy from the amino acid sequence. Note that SCAMPI predicted two regions in S1 as transmembrane, which implicates the S1 can be embedded with the membrane. (B, C) The color mapping of membrane insertion free energy for the PRE (B) and POST (C) structures, respectively. The first and last 9 residues are truncated due to the no data for the membrane insertion free energy. Interestingly, the high and low values of free energy are densely located at the stalk in the PRE state. However, some of the large mismatches are observed in NTD, RDB, sTM of the PRE ectodomain (B). On the other hand, the corresponding eTM region is extremely elongated as the random coil in POST state. The mismatched signal is more optimized in the POST structure and creates two bands near the stem and S1 regions (C).

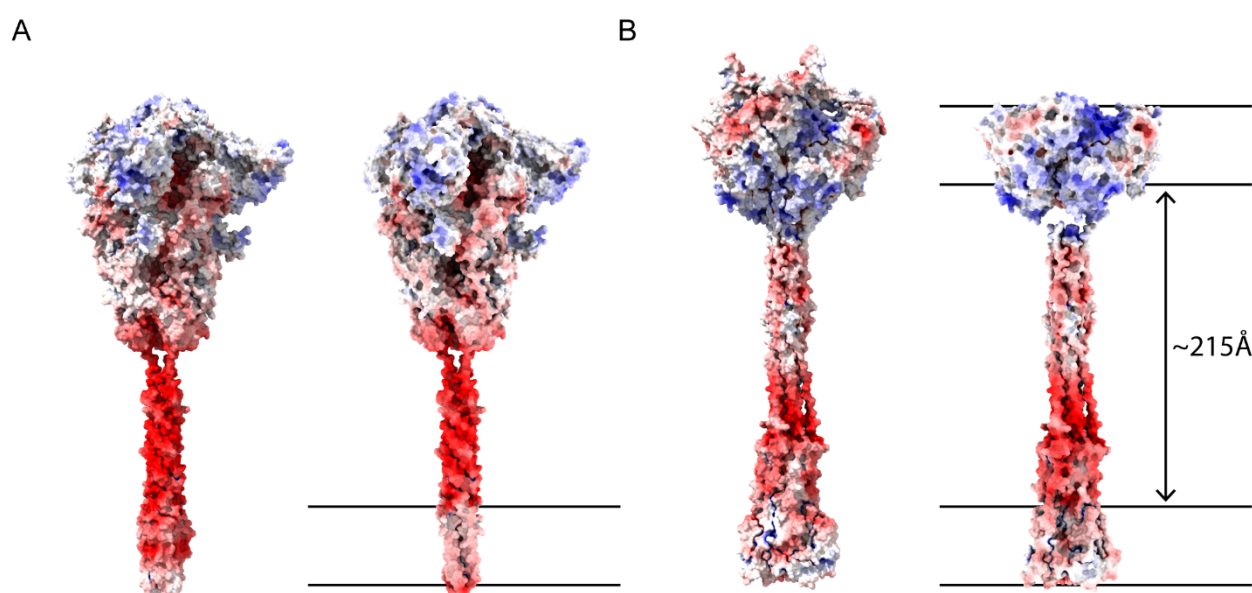

**Figure S7. Electrostatic potential on the surface of PRE and POST structures and presumable viral and host membrane positions in SE model.** (A, B) Electrostatic surface potential of PRE (A) and POST (B) structures are colored by red and blue for negative and positive values. Presumable positions of viral- and host- membranes are the regions between solid lines. Note that the full-length structures and electrostatic potentials for both full-length and truncated structures are calculated in the solution environment using APBS [5] and PDB2PQR [6]. The left figures of each panel A, B are made with full-length structures, while the right figures are made with structures truncating mobile segments at fusogenic localized regions (residue ids 1241-1273, and ids 686-719, 771-906, 1207-1273 were truncated for the PRE and POST, respectively). In the SE model, the CTs of the PRE structures are considered to expand along the inner surface of the viral membrane, while both terms of the S1/S2-S2' subunit extend from the stem region (Fig. 3F) and the main fusion peptide (dFP) and sTM are also considered to extend in the host membrane. With this assignment, the distance between two membrane surfaces is approximately 215 Å.



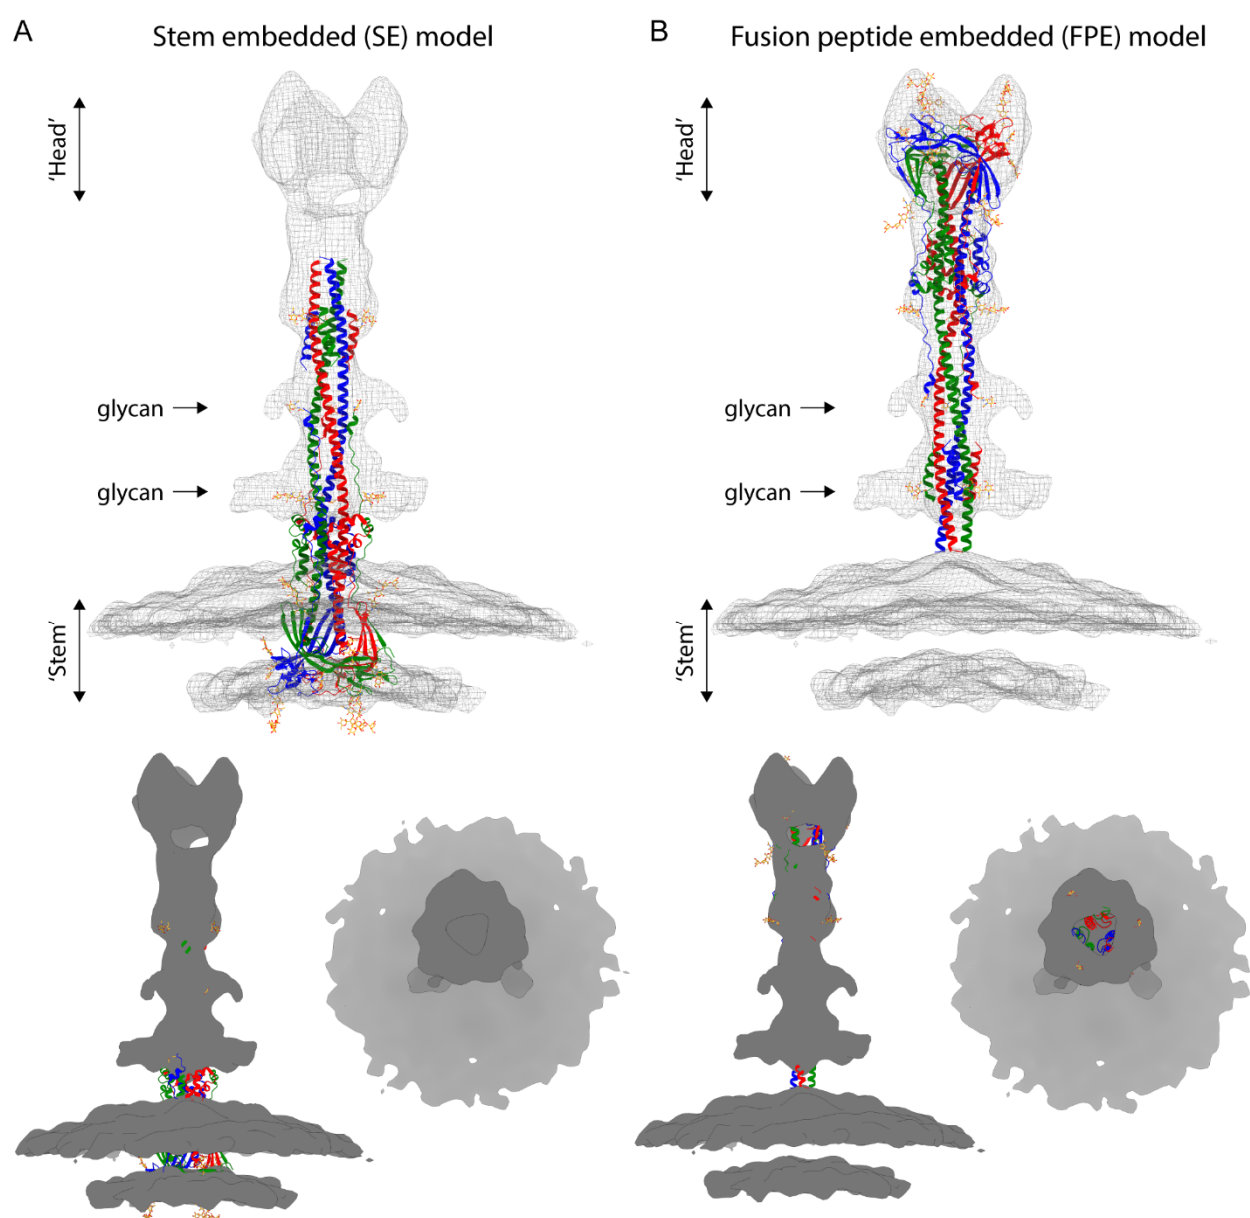

**Figure S8. Comparison of the POST structure orientations on the virion.** (A, B) Two structural orientations to fit the Cryo-ET image of the extended state on the virion (EMD-30428) are shown. The 'Head' region of the Cryo-ET image has a large cavity. For the fair comparison, the same SARS-CoV-2 POST structure (PDB: 6XRA) was used for the fitting. The glycans positions were also maintained as in the Cryo-EM structure. (A) Stem Embedded (SE) model. The stem is embedded in the viral membrane. The disordered segments, dFP, sTM, pTM, TM, are located at the top of the extended density. We support the SE model. (B) Fusion Peptide Embedded (FPE) model. Disordered segments, dFP, sTM, TM, are located in the viral membrane. In the main text, further the modeling including complete S1/S2-S2', S2' subunits are described (Fig. 3G).

## Step1-A. fragmentize an ideal helix

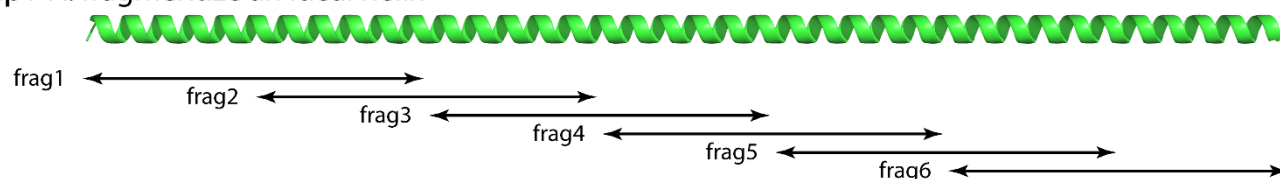

## Step1-B. Docking of each fragment applying a C3 symmetrical constraint

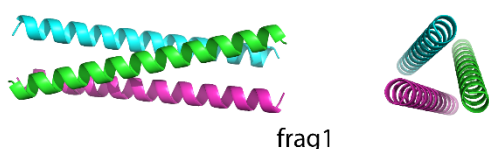

## Step1-C. Hybridize fragments (40 residues)

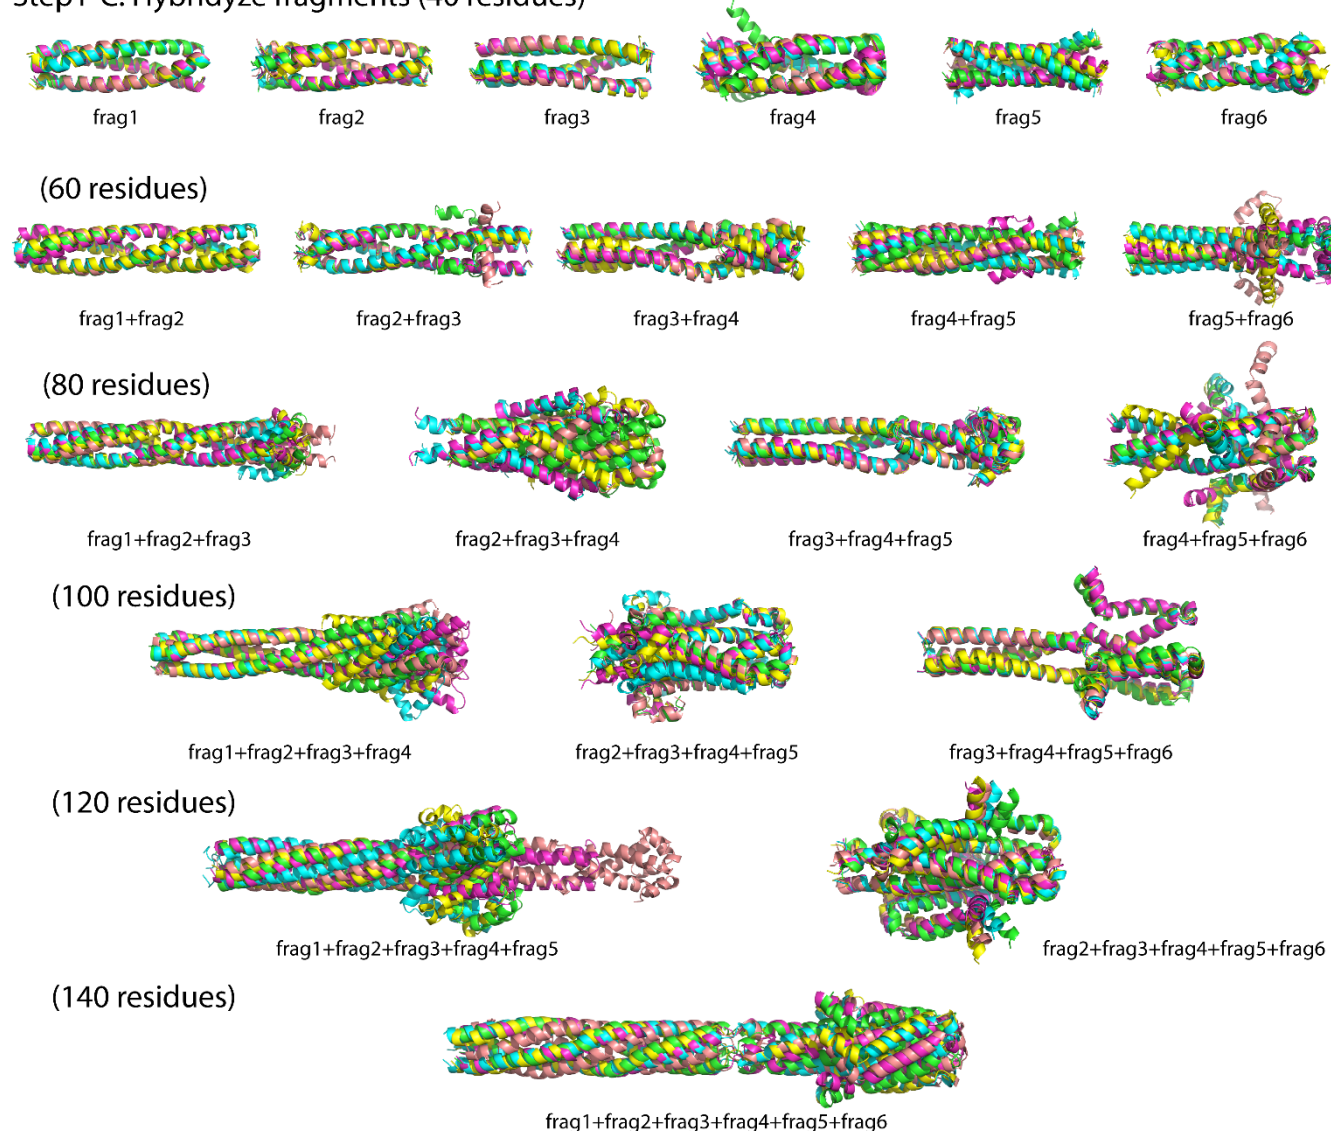

**Figure S9. Steps to construct a stalk in PRE state.** Rosetta hybridization protocol was iteratively used, starting from shorter fragments (40 residues) to longer fragments (140 residues). The top 5 structures are shown in Step1-C. Note some of fragments (e.g., frag4, frag6) tend to fold and form compact structures (e.g., frag2+frag3+frag4+frag5+frag6), suggesting the stalk twist is optimal as the 140-residue trimer with the N-term constraint. It appears the coiled-coil structure is out of the global minima without the constraint.



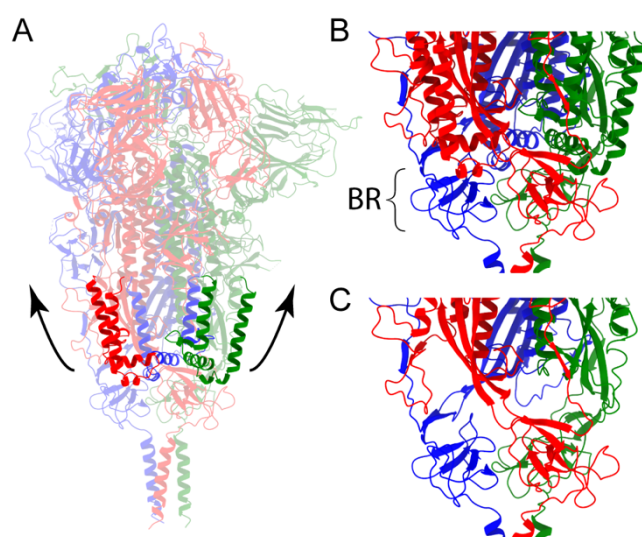

**Figure S10. Hypothetical dislocation of the sTM+HR1 segments.** (A) the position of the sTM+HR1 fragments (residue 866-942) in PRE state. (B) In the PRE state, a BR tightly interacts with sTM+HR1 segments, which sterically inhibits the large structural transition of the sTM+HR1 upwards. (C) Similar to the panel (B), but the sTM+HR1 fragment is removed. The dislocation of the sTM+HR1 fragment leaves a large empty space.

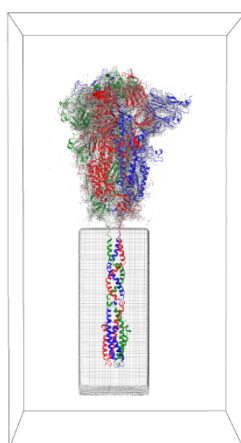

**Figure S11. Cryo-EM density used for the constraint in the PRE structure modeling.** The density map used as a constraint in Rosetta hybridize protocol to construct a full-length PRE structure. The density for the stalk region was removed from the Cryo-EM map (EMD-22292).

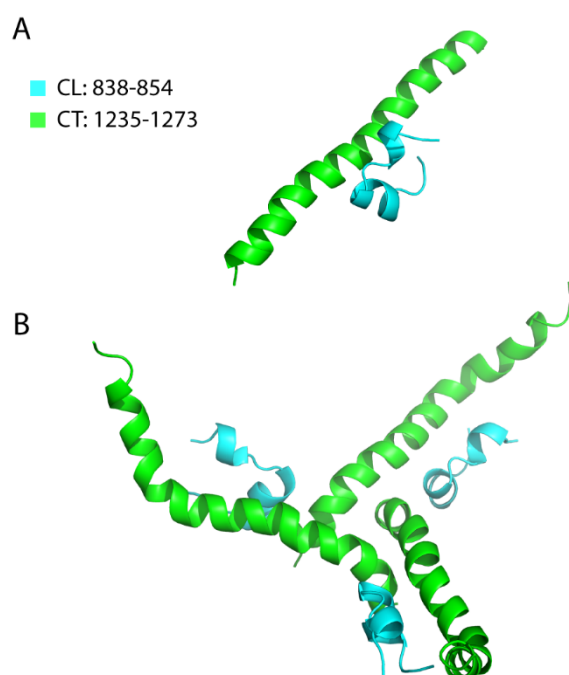

**Figure S12. Optimized POST state structure in the cytoplasmic region.** (A) Monomeric optimized structure of the cytoplasmic loop-cytoplasmic tail (CL-CT) segments complex. Cytoplasmic loop (CL) and cytoplasmic tail (CT) are shown in green and cyan, respectively. (B) Trimeric optimized structure. A C3 symmetric constraint was applied. The cytoplasmic complex is thought to work as the linchpin at the distal end of the uninterpreted density, restricting the possible conformation of the rest of the uninterpreted segments.

Table S1. Abbreviations used in this study.

| Abbreviation | meaning                                                   |
|--------------|-----------------------------------------------------------|
| ACE2         | Angiotensin-converting enzyme 2                           |
| BR           | $\beta$ -rich region                                      |
| BCoV         | Bovine coronavirus                                        |
| CEACAM1      | Carcinoembryonic antigen-related cell adhesion molecule 1 |
| cH           | Central helix                                             |
| CT           | Cytoplasmic tail                                          |
| CTD          | C-terminal domain                                         |
| CL           | Cytoplasmic loop                                          |
| CoV          | Coronavirus                                               |
| COVID-19     | Coronavirus disease 2019                                  |
| Cryo-EM      | Cryogenic electron microscopy                             |
| Cryo-ET      | Cryogenic electron tomography                             |
| dFP          | Downstream fusion peptide                                 |
| DPP4         | Dipeptidyl peptidase 4                                    |
| eTM          | Extended transmembrane                                    |
| ER           | Endoplasmic reticulum                                     |
| FP           | Fusion peptide                                            |
| FPE model    | Fusion peptide embedded model                             |
| HIV-1        | Human Immunodeficiency Virus Type 1                       |
| HR1          | Heptad repeat1                                            |
| HR2          | Heptad repeat2                                            |
| INT1         | Internal sub domain1                                      |
| INT2         | Internal sub domain2                                      |
| L            | Linker                                                    |
| LIC          | Long inter core                                           |
| LOC          | Long outer core                                           |
| LNP          | Lipid nanoparticle                                        |
| MAP Kinase   | Mitogen-activated protein kinase                          |
| MERS-CoV     | Middle East respiratory syndrome Coronavirus              |
| MHV          | Mouse hepatitis coronavirus                               |
| mRNA         | Messenger ribonucleic acid                                |
| NMR          | Nuclear magnetic resonance                                |
| NRP1         | Neuropilin 1                                              |
| NTD          | N-terminal domain                                         |
| ORF          | Open Reading Frame                                        |
| pTM          | Pre-transmembrane                                         |
| RAS          | Renin-Angiotensin System                                  |
| RBD          | Receptor binding domain                                   |
| RSV          | Respiratory syncytial virus                               |
| SARS-CoV-1/2 | Severe Acute Respiratory Syndrome Coronavirus 1/2         |
| SE model     | Stem embedded model                                       |
| sTM          | Sub-transmembrane                                         |
| TM           | Transmembrane                                             |
| TMPRSS2      | Transmembrane protease serine 2                           |
| uFP          | Upstream fusion peptide                                   |
| uH           | Upstream helix                                            |
| UPR          | Unfolded protein response                                 |

**Table S2. List of segments with previously reported functionality (fusogenic activity) in the literature.** The list of literature and fusogenic segments that are validated by experiments is shown. The segments are mostly chosen from SARS-CoV-1 spike, and corresponding residue ids in SARS-CoV-2 spike are listed. We could not identify exact residue ids in a few cases. In summary, the fusogenic regions are 258-273, 633-650, 682-685, 788-906, 915-931, 1095-1110, 1203-1273. Based on the comprehensive idea of functional regions, some of the segments are reorganized in this study (Fig. 1A). The characteristics of segments are also considered to construct the computational structural models in this work.

| Position<br>SARS-CoV-2 | Position<br>SARS-CoV-1 | Name in this<br>study | Name in the Ref.        | Ref.      | Memo                        |
|------------------------|------------------------|-----------------------|-------------------------|-----------|-----------------------------|
| 788-806                | 770-778                | uFP                   | SARS <sub>ww-I</sub>    | [7]       | FP                          |
| 882-904                | 864-886                | sTM                   | SARS <sub>ww-II</sub>   | [7]       | weak                        |
| 816-833                | 798 - 815              | dFP                   | S2 fusion peptide       | [8], [9]  | L803, L804, and F805        |
| 891-906                | 873-888                | sTM                   | SARS <sub>IFP</sub>     | [10]      | Interact with phospholipids |
| Upstream of HR1        | Upstream of HR1        | sTM                   | Upstream of HR1         | [11]      | Infection inhibition        |
| ca. 258-273            | ca. 245-260            | NTD                   | 34                      | [12]      | Obtained from Fig2b         |
| ca. 633-650            | ca. 619-636            | CTD                   | 85                      | [12]      | Obtained from Fig2b         |
| 846-906                | 828-888                | CL, sTM               | R1 (113,119)            | [12]      |                             |
| 876-904                | 858-886                | sTM                   | FP in R1                | [12]      |                             |
| 915-931                | 897-913                | N-term of HR1         | boundary in R1 (123)    | [12]      |                             |
| 1095-1110              | 1077-1092              | BR                    | R2 (147)                | [12]      |                             |
| 1203-1228              | 1185-1210              | pTM                   | R3 (162,163)            | [12]      |                             |
| 788-806                | 770-788                | dFP                   | SARS <sub>FP</sub>      | [13]      |                             |
| 788-806                | 770-788                | dFP                   | FP                      | [14], [9] |                             |
| 891-906                | 873-888                | sTM                   | IFP                     | [14], [9] |                             |
| 1203-1220              | 1185-1202              | pTM                   | PTM                     | [14], [9] |                             |
| 873-898                | 855-880                | sTM                   | pFP                     | [9], [15] |                             |
| 776-839                | 758-821                | uFP, dFP              | LFP                     | [9]       |                             |
| 1205-1218              | 1187-1200              | pTM                   | JMD                     | [16]      |                             |
| 1208-1222              | 1190-1204              | pTM                   | Trp-rich region         | [17]      |                             |
| 816-836                | 798-818                | dFP                   | FP1                     | [18]      |                             |
| 834-853                | 816-835                | CL                    | FP2                     | [18]      |                             |
| 835-855                | 817-837                | CL                    | Cysteine-flanked region | [19]      | Antigenic determinant       |
| 1235-1273              | 1217-1255              | CT                    | endodomain              | [20]      |                             |
| 1207-1256              | 1189-1238              | pTM, TM               | TMD                     | [21]      |                             |
| 1224-1273              | 1206-1255              | TM, CT                | CT                      | [22]      |                             |
| 682-685                | NA                     | CendR                 | CendR                   | [23]      |                             |

**Table S3. List of the publicly available spike protein computational models.** To date, there are three downloadable structures of full-length spike protein for SARS-CoV-2. All of them are in the PRE state and computationally modeled incorporating Cryo-EM structures. There are more computational studies about the PRE state spikes reported in the literature.

| State | URL                                                                                                                                                                                              | Tools                      | Ref. | Published  |
|-------|--------------------------------------------------------------------------------------------------------------------------------------------------------------------------------------------------|----------------------------|------|------------|
| PRE   | <a href="http://www.charmm-gui.org/docs/archive/covid19">http://www.charmm-gui.org/docs/archive/covid19</a>                                                                                      | GalaxyTBM,<br>FALC, ISOLDE | [24] | 2020-06-19 |
| PRE   | <a href="https://zhanglab.ccmb.med.umich.edu/COVID-19/">https://zhanglab.ccmb.med.umich.edu/COVID-19/</a>                                                                                        | C-I-TASSER                 | NA   |            |
| PRE   | <a href="https://doi.org/10.1021/acscentsci.0c01056">https://doi.org/10.1021/acscentsci.0c01056</a><br><a href="https://amarolab.ucsd.edu/covid19.php">https://amarolab.ucsd.edu/covid19.php</a> | Modeller,<br>i-TASSER      | [25] | 2020-09-23 |

**Table S4. Examples of rotational motion of an S1 trimer.** The rotational motions along the 3-fold axis were reported in the literature. They are associated with RDB Up/Down and different degrees. Direction of the S1 rotation is analyzed against the 3-fold rotation axis from an S1 trimer side. \* the rotation is mainly attributed dihedral angle  $\varphi_2$  (see the ref [26] for the definition).

| Virus      | State of Structure1 | EMD ID / PDB ID 1 | State of Structure2 | EMD ID / PDB ID 2 | S1s rotation (struc1 to struc2) | Ref. |
|------------|---------------------|-------------------|---------------------|-------------------|---------------------------------|------|
| SARS-CoV-2 | Down                | EMD-22292 / 6XR8  | Up                  | EMD-21457 / 6VYB  | Clockwise                       | [27] |
| SARS-CoV-2 | Down                | EMDB-11207 / 6ZGI | Intermediate        | EMDB-11206 / 6ZGH | Clockwise                       | [28] |
| SARS-CoV-2 | Tightly Down        | EMD-30701 / 7DF3  | Down                | EMD-21452 / 6VXX  | Clockwise                       | [29] |
| SARS-CoV-2 | Tightly Down        | EMD-30701 / 7DF3  | Up                  | EMD-30701 / 7DK3  | Clockwise                       | [29] |
| SARS-CoV-2 | Down                | Ensemble of Down  | Up                  | Ensemble of Up    | Clockwise *                     | [26] |
| SARS-CoV-1 | No ligand (Down)    | EMD-1423          | ACE2 bind (Up)      | EMD-1425          | Clockwise                       | [30] |



**Table S5. List of deposited EMDB density maps and PDB structures.** There are more than 300 Cryo-EM PRE state structures. For simplicity and visibility, only relevant coronavirus spikes in the POST state are listed.

| Virus      | State       | EMD ID / PDB ID  | Resolution | Ref. | Released |
|------------|-------------|------------------|------------|------|----------|
| MHV        | Post-fusion | EMD-7040 / 6B3O  | 4.1        | [31] | 2017-10  |
| SARS-CoV   | Post-fusion | EMD-9597         | 30.5       | [4]  | 2018-08  |
| SARS-CoV-2 | Post-fusion | EMD-11627        | 10.7       | [32] | 2020-10  |
| SARS-CoV-2 | Post-fusion | EMD-22293 / 6XRA | 3.0        | [27] | 2020-07  |
| SARS-CoV   | Post-fusion | EMD-30072 / 6M3W | 3.9        | [33] | 2020-06  |
| SARS-CoV-2 | Post-fusion | EMD-30428        | 15.3       | [34] | 2020-09  |

Table S6. Summary of the population in extended (INT/POST) state on the SARS-CoV-2 virion.

| Ref. | Population of extended (INT/POST) state | Cell culture   | Inactivation           | Memo                                                        |
|------|-----------------------------------------|----------------|------------------------|-------------------------------------------------------------|
| [35] | < 0.1 %                                 | Vero E6        | paraformaldehyde       |                                                             |
| [34] | 18%                                     | Vero           | paraformaldehyde       |                                                             |
| [36] | almost 100%                             | A549 + ACE2    | paraformaldehyde       | ACE2 dependency is possible                                 |
|      | Mixture                                 | Vero E6        |                        |                                                             |
|      | Almost 0%                               | Calu3          |                        |                                                             |
| [37] | 3%                                      | Vero E6, Calu3 | formaldehyde           | Purification method can alter the ratio of PRE conformation |
| [32] | 74.4%                                   |                | $\beta$ -propiolactone | S1 is partly present (Fig. S2c)                             |

**Table S7. List of putative host factors including receptors and attachment factors.** The host factors affecting infectivity are listed. Note they are mostly considered to serve as a receptor and their receptor binding sites are located in S1. (For review [38], [39]). \* computational study. For comprehensive factors, see Table S2 in [40].

| Virus               | Receptor/effector             | Binding site           | Ref.       |
|---------------------|-------------------------------|------------------------|------------|
| SARS-CoV-2          | ACE2                          | S1 RDB                 | [41], [42] |
| SARS-CoV-2          | NRP1                          | S1 CendR               | [43], [44] |
| SARS-CoV-2          | heparin sulfate               | S1 RDB*                | [45], [46] |
| SARS-CoV-2          | Sugar?, protein?              | S1 NTD (GTNGTKR motif) | [47]       |
| SARS-CoV-2          | Sialic acid                   | S1 NTD                 | [48]       |
| HCoV-OC43           | 9-O-acetylated sialic acid    | A domain               | [49]       |
| SARS-CoV-2          | BSG, CD147, BASIGIN           | S1 RBD                 | [50]       |
| SARS-CoV-2          | GRP78                         | S1 RBD*                | [51]*      |
| MARS-CoV, bCoV-HKU9 | GRP78                         | Spike RBD              | [52]       |
| SARS-CoV-2          | lipid                         | S1 RBD                 | [53]       |
| SARS-CoV-2          | Ganglioside                   | S1 NTD                 | [54]       |
| SARS-CoV-2          | cholesterol                   |                        | [55], [56] |
| SARS-CoV-2          | Ezrin                         | CT                     | [20]       |
| SARS-CoV-1          | Ca <sup>2+</sup>              | S2 (fusion peptide)    | [18]       |
| SARS-CoV-2          | IFITM, IFITM1, IFITM2, IFITM3 |                        | [57], [58] |

**Table S8.** List of enzymes reported with the cleavage sites.

| <b>Virus</b>              | <b>S1/S2</b>                                                  | <b>S2'</b>          | <b>Ref.</b> |
|---------------------------|---------------------------------------------------------------|---------------------|-------------|
| SARS-CoV-1                | Trypsin, Cathepsin L                                          |                     | [59]        |
| SARS-CoV-2                | Furin, PC1, Trypsin, Cathepsin L, Cathepsin B                 |                     | [59]        |
| SARS-CoV-2                | Furin                                                         | TMPRSS2             | [60]        |
| SARS-CoV-1                | Cathepsin L, trypsin, Thermolysin, TMPRSS11d (HAT), Factor Xa | Elastase            | [61], [62]  |
| SARS-CoV-2                | Furin                                                         |                     | [63],[64]   |
| SARS-CoV-1,<br>MARS-CoV   | Not Furin                                                     |                     | [64]        |
| SARS-CoV-1                | Trypsin                                                       | TMPRSS2             | [65]        |
| SARS-CoV-2                | Cathepsin L<br>Not Cathepsin B                                |                     | [66]        |
| SARS-CoV-1                | Furin, Cathepsin L                                            |                     | [67]        |
| SARS-CoV-1,<br>SARS-CoV-2 |                                                               | TMPRSS11D, TMPRSS13 | [68]        |

**Table S9. Summary of experimental conditions that are successful in obtaining atomic SARS-CoV-1/2 spike structure in POST state in literature.** It is noteworthy that the situations of the spike (e.g., S1 shedding) are slightly different depending on the experimental conditions. The cleavage of S1/S2 and S2', and up/down of RBD appears to depend on the enzyme and soluble ACE2 concentrations, respectively. Also, ectodomain spike may not require S2' cleavage for the POST transition.

| Ref. | Virus      | Condition                                                       | Memo                                             |
|------|------------|-----------------------------------------------------------------|--------------------------------------------------|
| [33] | SARS-CoV-1 | With soluble ACE2 (1:20), trypsin, spike ectodomain, low pH 5.5 | S1 is absent (emd_30072)                         |
| [27] | SARS-CoV-2 | With soluble ACE2 (1:10) and NP-40 (detergent)                  | S1 is absent (Fig.4C)<br>S2' is cleaved (Fig.S8) |
| [4]  | SARS-CoV-1 | With soluble ACE2 (1:3), trypsin, spike ectodomain, low pH 5.6  | S1 is present (Fig.3D)                           |

**Table S10. Comparison of viral fusion mechanism between our model and the conventional model mediated by class I fusion protein.** The limited items are listed to compare.

|                                                                    | <b>Proposed mechanism in this work</b>                                                          | <b>Traditional descriptions mediated by class I fusion protein</b>                             |
|--------------------------------------------------------------------|-------------------------------------------------------------------------------------------------|------------------------------------------------------------------------------------------------|
| Structural states                                                  | PRE, INT, POST                                                                                  | Pre-fusion, Pre-hairpin, Fold-back, Post-fusion                                                |
| Unresolved structures                                              | INT                                                                                             | Pre-hairpin<br>Hairpin<br>Fold-back                                                            |
| Viral transmembrane region of POST/post-fusion state on the virion | Stem (SE model)                                                                                 | TM and dFP (FPE model)                                                                         |
| Timing of S1 dissociation                                          | Induced by S2' cleavage (after the structural transition)                                       | Before the structural transition                                                               |
| Role of S1                                                         | Receptor binding and determinant of the membrane fusion                                         | Receptor binding                                                                               |
| Role of S1/S2-S2'                                                  | Stabilizing the stem in the viral membrane. Making a smooth curvature of fused membrane surface | Not discussed                                                                                  |
| Position of CT during the transition                               | Move from the viral to host membrane                                                            | Always in the viral membrane                                                                   |
| The number of spike protein required for membrane fusion           | Any                                                                                             | Multiple, but not large number                                                                 |
| Cooperativity for the structural transition among spikes           | No restriction or concerted S1 trimers release                                                  | Concerted structural transition                                                                |
| Distribution for membrane fusion                                   | No restriction                                                                                  | Aligned around the pore                                                                        |
| Location of the spike after the membrane fusion                    | S1, S1/S2-S2', S2' subunits, mediating the fusion, pass through the host membrane               | S1 sheds. S2' ectodomain is in the extracellular region or extrasellar vesicle, membrane-bound |



**Table S11. List of software used in this study.**

| <b>Ref.</b> | <b>Name of the software</b> | <b>Protocol</b>        | <b>Purpose</b>                   |
|-------------|-----------------------------|------------------------|----------------------------------|
| [69]        | Rosetta                     | Symmetric Docking      | Stalk modeling for the PRE state |
| [70]        | Rosetta                     | Hybridize              | Combine smaller fragments        |
| [71]        | NAMD                        | Molecular Dynamics     | Flexible fitting                 |
| [72]        | Rosetta                     | Docking                | To model the CL-CT complex       |
| [73]        | Rosetta+PyRosetta           | TrRosetta              | To model small fragments         |
| [74]        | Rosetta                     | <i>Ab-initio</i> relax | To model small fragments         |

**Table S12. Resolution and sampling statistics for the original domains.** List of the domains used/modeled to further hybridize the full-length computational models (PRE, POST structures). The Cryo-EM maps (EMD-22292, EMD-9597) are used for the overall shape constraints to apply in the PRE, POST structural modeling, respectively. The partial disordered region for Cryo-EM residue ids is not described.

| State | Domain                 | Residue ids           | Source/Method                | Source ID | Resolution/Sampling                                                        |
|-------|------------------------|-----------------------|------------------------------|-----------|----------------------------------------------------------------------------|
| PRE   | Ectodomain             | 14-1162               | Cryo-EM                      | PDB: 6XR8 | resolution 2.9 Å                                                           |
| PRE   | Stalk                  | 1114-1273             | Rosetta dock + hybridization | NA        | over 114,000 docking structures<br>over 305,000 fragments sampled in total |
| POST  | S1                     | 1-685                 |                              |           |                                                                            |
| POST  | Main                   | 706-771<br>919-1196   | Cryo-EM                      | PDB: 6VSB | resolution: 3.5 Å                                                          |
| POST  | Main                   | 703-770,<br>912-1197  | Cryo-EM                      | PDB: 6M3W | resolution: 3.9 Å                                                          |
| POST  | Main                   | 703-770,<br>912-1197  | Cryo-EM                      | PDB: 6XRA | resolution: 3.0 Å                                                          |
| POST  | N-term of<br>S1/S2-S2' | 667-705               | TrRosetta                    | NA        | top 5 structures are provided online                                       |
| POST  | C-term of<br>S1/S2-S2' | 797-815               | Rosetta <i>ab-initio</i>     | NA        | over 32,000 structures sampled                                             |
| POST  | CT-CL monomer          | 838-845,<br>1237-1273 | Rosetta dock                 | NA        | over 24,000 structures sampled                                             |
| POST  | CT-CL trimer           | 838-845,<br>1237-1273 | Rosetta dock                 | NA        | over 32,000 structures sampled                                             |

# References

1. Tsirigos, K.; Peters, C.; Shu, N.; Käll, L.; Elofsson, A. The TOPCONS web server for consensus prediction of membrane protein topology and signal peptides. *Nucleic Acids Res.* **2015**, *43*, W401–W407, doi:10.1093/nar/gkv485.
2. Nakamura, T.; Yamada, K.D.; Tomii, K.; Katoh, K. Parallelization of MAFFT for large-scale multiple sequence alignments. *Bioinform.* **2018**, *34*, 2490–2492, doi:10.1093/bioinformatics/bty121.
3. Gouet, P. ESPript/ENDscript: extracting and rendering sequence and 3D information from atomic structures of proteins. *Nucleic Acids Res.* **2003**, *31*, 3320–3323, doi:10.1093/nar/gkg556.
4. Song, W.; Gui, M.; Wang, X.; Xiang, Y. Cryo-EM structure of the SARS coronavirus spike glycoprotein in complex with its host cell receptor ACE2. *PLoS Pathog.* **2018**, *14*, e1007236, doi:10.1371/journal.ppat.1007236.
5. Jurrus, E.; Engel, D.; Star, K.; Monson, K.; Brandi, J.; Felberg, L.E.; Brookes, D.H.; Wilson, L.; Chen, J.; Liles, K.; et al. Improvements to the APBS biomolecular solvation software suite. *Protein Sci.* **2018**, *27*, 112–128, doi:10.1002/pro.3280.
6. Dolinsky, T.J.; Czodrowski, P.; Li, H.; Nielsen, J.E.; Jensen, J.H.; Klebe, G.; Baker, N.A. PDB2PQR: expanding and upgrading automated preparation of biomolecular structures for molecular simulations. *Nucleic Acids Res.* **2007**, *35*, W522–W525, doi:10.1093/nar/gkm276.
7. Sainz, B.; Rausch, J.M.; Gallaher, W.R.; Garry, R.; Wimley, W.C. Identification and Characterization of the Putative Fusion Peptide of the Severe Acute Respiratory Syndrome-Associated Coronavirus Spike Protein. *J. Virol.* **2005**, *79*, 7195–7206, doi:10.1128/jvi.79.11.7195-7206.2005.
8. Madu, I.G.; Roth, S.L.; Belouzard, S.; Whittaker, G.R. Characterization of a Highly Conserved Domain within the Severe Acute Respiratory Syndrome Coronavirus Spike Protein S2 Domain with Characteristics of a Viral Fusion Peptide. *J. Virol.* **2009**, *83*, 7411–7421, doi:10.1128/jvi.00079-09.
9. Mahajan, M.; Chatterjee, D.; Bhuvaneswari, K.; Pillay, S.; Bhattacharjya, S. NMR structure and localization of a large fragment of the SARS-CoV fusion protein: Implications in viral cell fusion. *Biochim. et Biophys. Acta (BBA) - Biomembr.* **2018**, *1860*, 407–415, doi:10.1016/j.bbamem.2017.10.002.
10. Guillén, J.; Pérez-Berná, A.J.; Moreno, M.R.; Villalán, J. A Second SARS-CoV S2 Glycoprotein Internal Membrane-Active Peptide. Biophysical Characterization and Membrane Interaction. *Biochem.* **2008**, *47*, 8214–8224, doi:10.1021/bi800814q.
11. Bosch, B.J.; Martina, B.E.E.; van der Zee, R.; Lepault, J.; Haijema, B.J.; Versluis, C.; Heck, A.; de Groot, R.; Osterhaus, A.; Rottier, P.J.M. Severe acute respiratory syndrome coronavirus (SARS-CoV) infection inhibition using spike protein heptad repeat-derived peptides. *Proc. Natl. Acad. Sci.* **2004**, *101*, 8455–8460, doi:10.1073/pnas.0400576101.
12. Guille'n, J.; Pe'rez-Berna, A.; Moreno, M.R.; Villalal'n, J. Identification of the Membrane-Active Regions of the Severe Acute Respiratory Syndrome Coronavirus Spike Membrane Glycoprotein Using a 16/18-Mer Peptide Scan: Implications for the Viral Fusion Mechanism. *J. Virol.* **2005**, *79*, 1743–1752. 10.1128/JVI.79.3.1743.
13. Guillén, J.; de Almeida, R.F.M.; Prieto, M.; Villalán, J. Structural and Dynamic Characterization of the Interaction of the Putative Fusion Peptide of the S2 SARS-CoV Virus Protein with Lipid Membranes. *J. Phys. Chem. B* **2008**, *112*, 6997–7007, doi:10.1021/jp7118229.
14. Mahajan, M.; Bhattacharjya, S. NMR structures and localization of the potential fusion peptides and the pre-transmembrane region of SARS-CoV: Implications in membrane fusion. *Biochim. et Biophys. Acta (BBA) - Biomembr.* **2015**, *1848*, 721–730, doi:10.1016/j.bbamem.2014.11.025.
15. Ou, X.; Zheng, W.; Shan, Y.; Mu, Z.; Dominguez, S.R.; Holmes, K.V.; Qian, Z. Identification of the Fusion Peptide-Containing Region in Betacoronavirus Spike Glycoproteins. *J. Virol.* **2016**, *90*, 5586–5600, doi:10.1128/jvi.00015-16.
16. Howard, M.W.; Travanty, E.A.; Jeffers, S.A.; Smith, M.K.; Wennier, S.T.; Thackray, L.B.; Holmes, K.V. Aromatic Amino Acids in the Juxtamembrane Domain of Severe Acute Respiratory Syndrome Coronavirus Spike Glycoprotein Are Important for Receptor-Dependent Virus Entry and Cell-Cell Fusion. *J. Virol.* **2008**, *82*, 2883–2894, doi:10.1128/jvi.01805-07.
17. Lu, Y.; Neo, T.L.; Liu, D.X.; Tam, J.P. Importance of SARS-CoV spike protein Trp-rich region in viral infectivity. *Biochem. Biophys. Res. Commun.* **2008**, *371*, 356–360, doi:10.1016/j.bbrc.2008.04.044.
18. Lai, A.L.; Millet, J.K.; Daniel, S.; Freed, J.H.; Whittaker, G.R. The SARS-CoV Fusion Peptide Forms an Extended Bipartite Fusion Platform that Perturbs Membrane Order in a Calcium- Dependent Manner. *J Mol Biol* **2017**, *429*, 3875–3892.
19. Madu, I.G.; Belouzard, S.; Whittaker, G.R. SARS-coronavirus spike S2 domain flanked by cysteine residues C822 and C833 is important for activation of membrane fusion. *Virol. J.* **2009**, *393*, 265–271, doi:10.1016/j.virol.2009.07.038.
20. Millet, J.K.; Kien, F.; Cheung, C.-Y.; Siu, Y.-L.; Chan, W.-L.; Li, H.; Leung, H.-L.; Jaume, M.; Bruzzone, R.; Peiris, J.S.M.; et al. Ezrin Interacts with the SARS Coronavirus Spike Protein and Restrains Infection at the Entry Stage. *PLoS ONE* **2012**, *7*, e49566, doi:10.1371/journal.pone.0049566.
21. Corver, J.; Broer, R.; Van Kasteren, P.; Spaan, W.J.M. Mutagenesis of the transmembrane domain of the SARS coronavirus spike glycoprotein: refinement of the requirements for SARS coronavirus cell entry. *Virol. J.* **2009**, *6*, 230, doi:10.1186/1743-422x-6-230.
22. Petit, C.M.; Chouljenko, V.N.; Iyer, A.; Colgrove, R.; Farzan, M.; Knipe, D.M.; Kousoulas, K. Palmitoylation of the cysteine-rich endodomain of the SARS-coronavirus spike glycoprotein is important for spike-mediated cell fusion. *Virol. J.* **2007**, *360*, 264–274, doi:10.1016/j.virol.2006.10.034.
23. Teesalu, T.; Sugahara, K.N.; Kotamraju, V.R.; Ruoslahti, E. C-end rule peptides mediate neuropilin-1-dependent cell, vascular, and tissue penetration. *Proc. Natl. Acad. Sci.* **2009**, *106*, 16157–16162, doi:10.1073/pnas.0908201106.

24. Woo, H.; Park, S.-J.; Choi, Y.K.; Park, T.; Tanveer, M.; Cao, Y.; Kern, N.R.; Lee, J.; Yeom, M.S.; Croll, T.I.; et al. Developing a Fully Glycosylated Full-Length SARS-CoV-2 Spike Protein Model in a Viral Membrane. *J. Phys. Chem. B* **2020**, *124*, 7128–7137, doi:10.1021/acs.jpcc.0c04553.
25. Casalino, L.; Gaieb, Z.; Goldsmith, J.A.; Hjorth, C.K.; Dommer, A.C.; Harbison, A.M.; Fogarty, C.A.; Barros, E.P.; Taylor, B.C.; McLellan, J.S.; et al. Beyond Shielding: The Roles of Glycans in the SARS-CoV-2 Spike Protein. *ACS Central Sci.* **2020**, *6*, 1722–1734, doi:10.1021/acscentsci.0c01056.
26. Henderson, R.; Edwards, R.J.; Mansouri, K.; Janowska, K.; Stalls, V.; Gobeil, S.M.C.; Kopp, M.; Li, D.; Parks, R.; Hsu, A.L.; et al. Controlling the SARS-CoV-2 spike glycoprotein conformation. *Nat. Struct. Mol. Biol.* **2020**, *27*, 925–933, doi:10.1038/s41594-020-0479-4.
27. Cai, Y.; Zhang, J.; Xiao, T.; Peng, H.; Sterling, S.M.; Jr, R.M.W.; Rawson, S.; Rits-Volloch, S.; Chen, B. Distinct conformational states of SARS-CoV-2 spike protein. *Science* **2020**, *369*, 1586–1592, doi:10.1126/science.abd4251.
28. Wrobel, A.G.; Benton, D.J.; Xu, P.; Roustian, C.; Martin, S.R.; Rosenthal, P.B.; Skehel, J.J.; Gamblin, S.J. SARS-CoV-2 and bat RaTG13 spike glycoprotein structures inform on virus evolution and furin-cleavage effects. *Nat. Struct. Mol. Biol.* **2020**, *27*, 763–767, doi:10.1038/s41594-020-0468-7.
29. Xu, C.; Wang, Y.; Liu, C.; Zhang, C.; Han, W.; Hong, X.; Wang, Y.; Hong, Q.; Wang, S.; Zhao, Q.; et al. Conformational dynamics of SARS-CoV-2 trimeric spike glycoprotein in complex with receptor ACE2 revealed by cryo-EM. *Sci. Adv.* **2020**, *5575*, 1–20. 10.1101/2020.06.30.177097.
30. Beniac, D.R.; Devarenes, S.L.; Andonov, A.; He, R.; Booth, T.F. Conformational Reorganization of the SARS Coronavirus Spike Following Receptor Binding: Implications for Membrane Fusion. *PLoS ONE* **2007**, *2*, e1082, doi:10.1371/journal.pone.0001082.
31. Walls, A.; Tortorici, M.A.; Snijder, J.; Xiong, X.; Bosch, B.-J.; Rey, F.A.; Veisler, D. Tectonic conformational changes of a coronavirus spike glycoprotein promote membrane fusion. *Proc. Natl. Acad. Sci.* **2017**, *114*, 11157–11162, doi:10.1073/pnas.1708727114.
32. Liu, C.; Mendonça, L.; Yang, Y.; Gao, Y.; Shen, C.; Liu, J.; Ni, T.; Ju, B.; Liu, C.; Tang, X.; et al. The Architecture of Inactivated SARS-CoV-2 with Postfusion Spikes Revealed by CryoEM and CryoET. *Structure* **2020**, *28*, 1–7. 10.2139/ssrn.3659985.
33. Fan, X.; Cao, D.; Kong, L.; Zhang, X. Cryo-EM analysis of the post-fusion structure of the SARS-CoV spike glycoprotein. *Nat. Commun.* **2020**, *11*, 1–10, doi:10.1038/s41467-020-17371-6.
34. Yao, H.; Song, Y.; Chen, Y.; Wu, N.; Xu, J.; Sun, C.; Zhang, J.; Weng, T.; Zhang, Z.; Wu, Z.; et al. Molecular Architecture of the SARS-CoV-2 Virus. *Cell* **2020**, *183*, 730–738.e13, doi:10.1016/j.cell.2020.09.018.
35. Turoňová, B.; Sikora, M.; Schürmann, C.; Hagen, W.J.H.; Welsch, S.; Blanc, F.E.C.; Von Bülow, S.; Gecht, M.; Bagola, K.; Hörner, C.; et al. In situ structural analysis of SARS-CoV-2 spike reveals flexibility mediated by three hinges. *Science* **2020**, *370*, eabd5223–208, doi:10.1126/science.abd5223.
36. Klein, S.; Cortese, M.; Winter, S.L.; Wachsmuth-Melm, M.; Neufeldt, C.J.; Cerikan, B.; Stanifer, M.L.; Boulant, S.; Bartenschlager, R.; Chlanda, P. SARS-CoV-2 structure and replication characterized by in situ cryo-electron tomography. *Nat. Commun.* **2020**, *11*, 5885, doi:10.1038/s41467-020-19619-7.
37. Ke, Z.; Oton, J.; Qu, K.; Cortese, M.; Zila, V.; McKeane, L.; Nakane, T.; Zivanov, J.; Neufeldt, C.J.; Cerikan, B.; et al. Structures and distributions of SARS-CoV-2 spike proteins on intact virions. *Nat. Cell Biol.* **2020**, *588*, 498–502, doi:10.1038/s41586-020-2665-2.
38. Cuervo, N.Z.; Grandvaux, N. ACE2: Evidence of role as entry receptor for SARS-CoV-2 and implications in comorbidities. *eLife* **2020**, *9*, 1–, doi:10.7554/elife.61390.
39. Kočar, E.; Režen, T.; Rozman, D. Cholesterol, lipoproteins, and COVID-19: Basic concepts and clinical applications. *Biochim. et Biophys. Acta (BBA) - Mol. Cell Biol. Lipids* **2021**, *1866*, 158849, doi:10.1016/j.bbalip.2020.158849.
40. Singh, M.; Bansal, V.; Feschotte, C. A Single-Cell RNA Expression Map of Human Coronavirus Entry Factors. *Cell Rep.* **2020**, *32*, 108175, doi:10.1016/j.celrep.2020.108175.
41. Lan, J.; Ge, J.; Yu, J.; Shan, S.; Zhou, H.; Fan, S.; Zhang, Q.; Shi, X.; Wang, Q.; Zhang, L.; et al. Structure of the SARS-CoV-2 spike receptor-binding domain bound to the ACE2 receptor. *Nat. Cell Biol.* **2020**, *581*, 215–220, doi:10.1038/s41586-020-2180-5.
42. Hoffmann, M.; Kleine-Weber, H.; Schroeder, S.; Krüger, N.; Herrler, T.; Erichsen, S.; Schiergens, T.S.; Herrler, G.; Wu, N.-H.; Nitsche, A.; et al. SARS-CoV-2 Cell Entry Depends on ACE2 and TMPRSS2 and Is Blocked by a Clinically Proven Protease Inhibitor. *Cell* **2020**, *181*, 271–280.e8, doi:10.1016/j.cell.2020.02.052.
43. Cantuti-Castelvetri, L.; Ojha, R.; Pedro, L.D.; Djannatian, M.; Franz, J.; Kuivanen, S.; Van Der Meer, F.; Kallio, K.; Kaya, T.; Anastasina, M.; et al. Neuropilin-1 facilitates SARS-CoV-2 cell entry and infectivity. *Science* **2020**, *370*, 856–860, doi:10.1126/science.abd2985.
44. Daly, J.; Simonetti, B.; Antón-Plágaro, C.; Kavanagh Williamson, M.; Shoemark, D.; Simón-Gracia, L.; Klein, K.; Bauer, M.; Hollandi, R.; Greber, U.; et al. Neuropilin-1 is a host factor for SARS-CoV-2 infection. *Science* **2020**, *3072*, 1–8. 10.1101/2020.06.05.134114.
45. Clausen, T.M.; Sandoval, D.R.; Spliid, C.B.; Pihl, J.; Perrett, H.R.; Painter, C.D.; Narayanan, A.; Majowicz, S.A.; Kwong, E.M.; McVicar, R.N.; et al. SARS-CoV-2 Infection Depends on Cellular Heparan Sulfate and ACE2. *Cell* **2020**, *183*, 1043–1057.e15, doi:10.1016/j.cell.2020.09.033.
46. Kim, S.Y.; Jin, W.; Sood, A.; Montgomery, D.W.; Grant, O.C.; Fuster, M.M.; Fu, L.; Dordick, J.S.; Woods, R.J.; Zhang, F.; et al. Characterization of heparin and severe acute respiratory syndrome-related coronavirus 2 (SARS-CoV-2) spike glycoprotein binding interactions. *Antivir. Res.* **2020**, *181*, 104873, doi:10.1016/j.antiviral.2020.104873.

47. Behloul, N.; Baha, S.; Shi, R.; Meng, J. Role of the GTNGTKR motif in the N-terminal receptor-binding domain of the SARS-CoV-2 spike protein. *Virus Res.* **2020**, *286*, 198058, doi:10.1016/j.virusres.2020.198058.
48. Engin, A.B.; Engin, E.D.; Engin, A. Dual function of sialic acid in gastrointestinal SARS-CoV-2 infection. *Environ. Toxicol. Pharmacol.* **2020**, *79*, 103436, doi:10.1016/j.etap.2020.103436.
49. Tortorici, M.A.; Walls, A.C.; Lang, Y.; Wang, C.; Li, Z.; Koerhuis, D.; Boons, G.-J.; Bosch, B.-J.; Rey, F.A.; De Groot, R.J.; et al. Structural basis for human coronavirus attachment to sialic acid receptors. *Nat. Struct. Mol. Biol.* **2019**, *26*, 481–489, doi:10.1038/s41594-019-0233-y.
50. Wang, K.; Chen, W.; Zhang, Z.; Deng, Y.; Lian, J.-Q.; Du, P.; Wei, D.; Zhang, Y.; Sun, X.-X.; Gong, L.; et al. CD147-spike protein is a novel route for SARS-CoV-2 infection to host cells. *Signal Transduct. Target. Ther.* **2020**, *5*, 1–10, doi:10.1038/s41392-020-00426-x.
51. Ibrahim, I.M.; Abdelmalek, D.H.; Elshahat, M.E.; Elfiky, A.A. COVID-19 spike-host cell receptor GRP78 binding site prediction. *J. Infect.* **2020**, *80*, 554–562, doi:10.1016/j.jinf.2020.02.026.
52. Chu, H.; Chan, C.-M.; Zhang, X.; Wang, Y.; Yuan, S.; Zhou, J.; Au-Yeung, R.K.-H.; Sze, K.-H.; Yang, D.; Shuai, H.; et al. Middle East respiratory syndrome coronavirus and bat coronavirus HKU9 both can utilize GRP78 for attachment onto host cells. *J. Biol. Chem.* **2018**, *293*, 11709–11726, doi:10.1074/jbc.ra118.001897.
53. Toelzer, C.; Gupta, K.; Yadav, S.K.N.; Borucu, U.; Davidson, A.D.; Williamson, M.K.; Shoemark, D.K.; Garzoni, F.; Stauffer, O.; Milligan, R.; et al. Free fatty acid binding pocket in the locked structure of SARS-CoV-2 spike protein. *Science* **2020**, *370*, 725–730, doi:10.1126/science.abd3255.
54. Fantini, J.; Chahinian, H.; Yahi, N. Leveraging coronavirus binding to gangliosides for innovative vaccine and therapeutic strategies against COVID-19. *Biochem. Biophys. Res. Commun.* **2021**, *538*, 132–136, doi:10.1016/j.bbrc.2020.10.015.
55. Wei, C.; Wan, L.; Yan, Q.; Wang, X.; Zhang, J.; Yang, X.; Zhang, Y.; Fan, C.; Li, D.; Deng, Y.; et al. HDL-scavenger receptor B type 1 facilitates SARS-CoV-2 entry. *Nat. Metab.* **2020**, *2*, 1391–1400, doi:10.1038/s42255-020-00324-0.
56. Sanders, D.W.; Jumper, C.C.; Ackerman, P.J.; Bracha, D.; Donlic, A.; Kim, H.; Kenney, D.; Castello-Serrano, I.; Suzuki, S.; Tamura, T.; et al. SARS-CoV-2 Requires Cholesterol for Viral Entry and Pathological Syncytia Formation. *bioRxiv* **2020**, 2020.12.14.422737.
57. Shi, G.; Kenney, A.D.; Kudryashova, E.; Zani, A.; Zhang, L.; Lai, K.K.; Hall-Stoodley, L.; Robinson, R.T.; Kudryashov, D.S.; Compton, A.A.; et al. Opposing activities of IFITM proteins in SARS-CoV-2 infection. *EMBO J.* **2021**, *40*, e106501, doi:10.15252/embj.2020106501.
58. Bozzo, C.P.; Nchioua, R.; Volcic, M.; Krüger, J.; Heller, S.; Stürzel, C.M.; Kmiec, D.; Conzelmann, C.; Müller, J.; Zech, F.; et al. IFITM proteins promote SARS-CoV-2 infection and are targets for virus inhibition. *bioRxiv* **2020**, 2020.08.18.255935. doi:10.1101/2020.08.18.255935.
59. Jaimes, J.A.; Millet, J.K.; Whittaker, G.R. Proteolytic Cleavage of the SARS-CoV-2 Spike Protein and the Role of the Novel S1/S2 Site. *iScience* **2020**, *23*, 101212, doi:10.1016/j.isci.2020.101212.
60. Bestle, D.; Heindl, M.R.; Limburg, H.; Van, T.V.L.; Pilgram, O.; Moulton, H.; A Stein, D.; Hards, K.; Eickmann, M.; Dolnik, O.; et al. TMPRSS2 and furin are both essential for proteolytic activation of SARS-CoV-2 in human airway cells. *Life Sci. Alliance* **2020**, *3*, e202000786, doi:10.26508/lsa.202000786.
61. Millet, J.K.; Whittaker, G.R. Host cell proteases: Critical determinants of coronavirus tropism and pathogenesis. *Virus Res.* **2015**, *202*, 120–134, doi:10.1016/j.virusres.2014.11.021.
62. Belouzard, S.; Madu, I.; Whittaker, G.R. Elastase-mediated Activation of the Severe Acute Respiratory Syndrome Coronavirus Spike Protein at Discrete Sites within the S2 Domain. *J. Biol. Chem.* **2010**, *285*, 22758–22763, doi:10.1074/jbc.m110.103275.
63. Hoffmann, M.; Kleine-Weber, H.; Pöhlmann, S. A Multibasic Cleavage Site in the Spike Protein of SARS-CoV-2 Is Essential for Infection of Human Lung Cells. *Mol. Cell* **2020**, *78*, 779–784.e5, doi:10.1016/j.molcel.2020.04.022.
64. Örd, M.; Faustova, I.; Loog, M. The sequence at Spike S1/S2 site enables cleavage by furin and phospho-regulation in SARS-CoV2 but not in SARS-CoV1 or MERS-CoV. *Sci. Rep.* **2020**, *10*, 1–10, doi:10.1038/s41598-020-74101-0.
65. Reinke, L.M.; Spiegel, M.; Plegge, T.; Hartleib, A.; Nehlmeier, I.; Gierer, S.; Hoffmann, M.; Hofmann-Winkler, H.; Winkler, M.; Pöhlmann, S. Different residues in the SARS-CoV spike protein determine cleavage and activation by the host cell protease TMPRSS2. *PLoS ONE* **2017**, *12*, e0179177, doi:10.1371/journal.pone.0179177.
66. Ou, X.; Liu, Y.; Lei, X.; Li, P.; Mi, D.; Ren, L.; Guo, L.; Guo, R.; Chen, T.; Hu, J.; et al. Characterization of spike glycoprotein of SARS-CoV-2 on virus entry and its immune cross-reactivity with SARS-CoV. *Nat. Commun.* **2020**, *11*, 1–12, doi:10.1038/s41467-020-15562-9.
67. Bosch, B.J.; Bartelink, W.; Rottier, P.J.M. Cathepsin L Functionally Cleaves the Severe Acute Respiratory Syndrome Coronavirus Class I Fusion Protein Upstream of Rather than Adjacent to the Fusion Peptide. *J. Virol.* **2008**, *82*, 8887–8890, doi:10.1128/jvi.00415-08.
68. Kishimoto, M.; Uemura, K.; Sanaki, T.; Sato, A.; Hall, W.; Kariwa, H.; Orba, Y.; Sawa, H.; Sasaki, M. TMPRSS11D and TMPRSS13 Activate the SARS-CoV-2 Spike Protein. *Viruses* **2021**, *13*, 384, doi:10.3390/v13030384.
69. André, I.; Bradley, P.; Wang, C.; Baker, D. Prediction of the structure of symmetrical protein assemblies. *Proc. Natl. Acad. Sci.* **2007**, *104*, 17656–17661, doi:10.1073/pnas.0702626104.
70. Song, Y.; DiMaio, F.; Wang, R.Y.-R.; Kim, D.; Miles, C.; Brunette, T.; Thompson, J.; Baker, D. High-Resolution Comparative Modeling with RosettaCM. *Struct.* **2013**, *21*, 1735–1742, doi:10.1016/j.str.2013.08.005.

- 
71. Phillips, J.C.; Hardy, D.J.; Maia, J.D.C.; Stone, J.E.; Ribeiro, J.V.; Bernardi, R.C.; Buch, R.; Fiorin, G.; Hénin, J.; Jiang, W.; et al. Scalable molecular dynamics on CPU and GPU architectures with NAMD. *J. Chem. Phys.* **2020**, *153*, 044130, doi:10.1063/5.0014475.
  72. Chaudhury, S.; Berrondo, M.; Weitzner, B.D.; Muthu, P.; Bergman, H.; Gray, J.J. Benchmarking and Analysis of Protein Docking Performance in Rosetta v3.2. *PLOS ONE* **2011**, *6*, e22477, doi:10.1371/journal.pone.0022477.
  73. Yang, J.; Anishchenko, I.; Park, H.; Peng, Z.; Ovchinnikov, S.; Baker, D. Improved protein structure prediction using predicted interresidue orientations. *Proc. Natl. Acad. Sci.* **2020**, *117*, 1496–1503, doi:10.1073/pnas.1914677117.
  74. Bradley, P.; Misura, K.M.S.; Baker, D. Toward High-Resolution de Novo Structure Prediction for Small Proteins. *Science* **2005**, *309*, 1868–1871, doi:10.1126/science.1113801.
